# Supplementary material for: Copper borate (CuB4O7)-promoted multi-component green synthesis of 2,4,5-triarylimidazole derivatives and evidence of in situ conversion of copper borate (CuB4O7) into Cu(OAc)2 in the presence of NH4OAc
Source: Royal Society of Chemistry journal article supplement (doi:10.1039/d3ra03183g), 2023-01-01
Supplement: d3ra03183g1.pdf [file d3ra03183g1.pdf]

### Supplementary Information file (S1)

**Copper Borate (CuB<sub>4</sub>O<sub>7</sub>) catalyzed multi-component green synthesis of 2,4,5-triarylimidazole derivatives and evidence of *in-situ* conversion of Copper Borate (CuB<sub>4</sub>O<sub>7</sub>) into Cu(OAc)<sub>2</sub> in presence of NH<sub>4</sub>OAc.**

Sailesh Chettri<sup>a</sup>, Sumiran Tamang<sup>a</sup>, Kiran Pradhan<sup>b</sup> Biswajit Sinha<sup>b</sup>, and Dhiraj

Brahman<sup>aa</sup>Department of Chemistry, St. Joseph's College, Darjeeling India-734104

<sup>b</sup>Department of Chemistry, University of North Bengal, Darjeeling India-734013

#### TABLE OF CONTENTS

|            | Contents                                                                           | Page No.   |
|------------|------------------------------------------------------------------------------------|------------|
| <b>I</b>   | <b>Copy of <sup>1</sup>H NMR spectra</b>                                           | <b>2-9</b> |
| <b>II</b>  | <b>Table S1. Crystal data collection and structure refinement for compound (6)</b> | <b>9</b>   |
| <b>III</b> | <b>Table S2 Selected bond lengths (Å) and bond angles (°) for compound (6)</b>     | <b>10</b>  |
| <b>IV</b>  | <b>Table S3 Hydrogen bonded geometries in compound (6)</b>                         | <b>10</b>  |

## I. Copy of $^1\text{H}$ NMR spectra

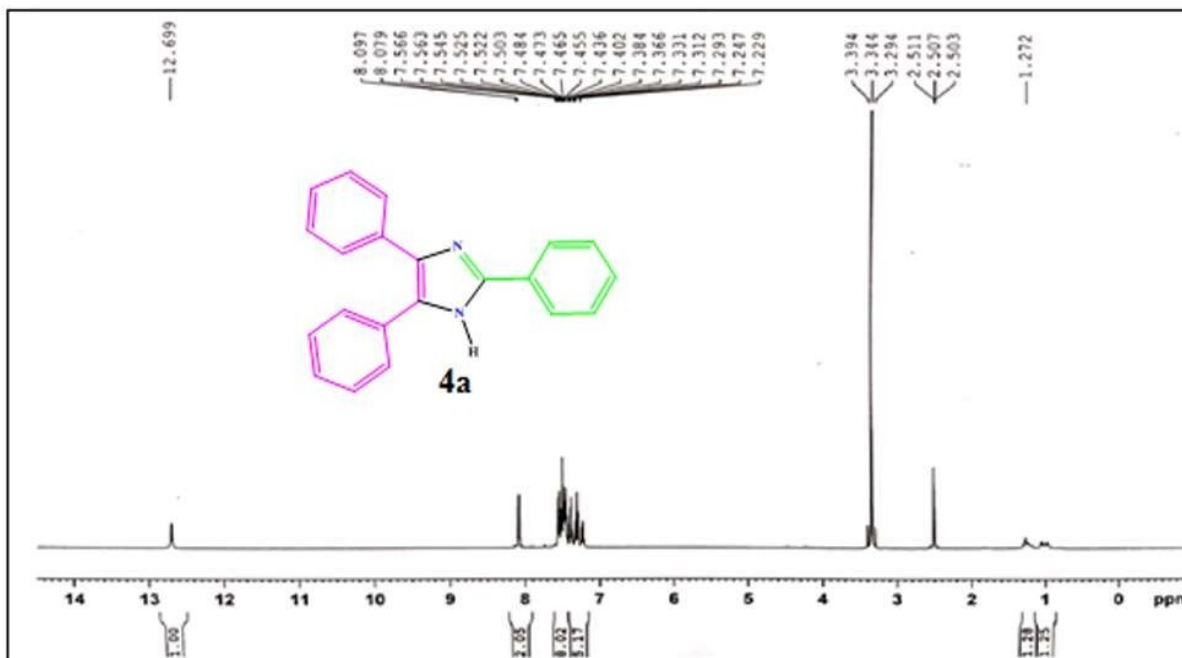

$^1\text{H}$  NMR spectra of 2,4,5-triphenyl-1H-imidazole (4a)

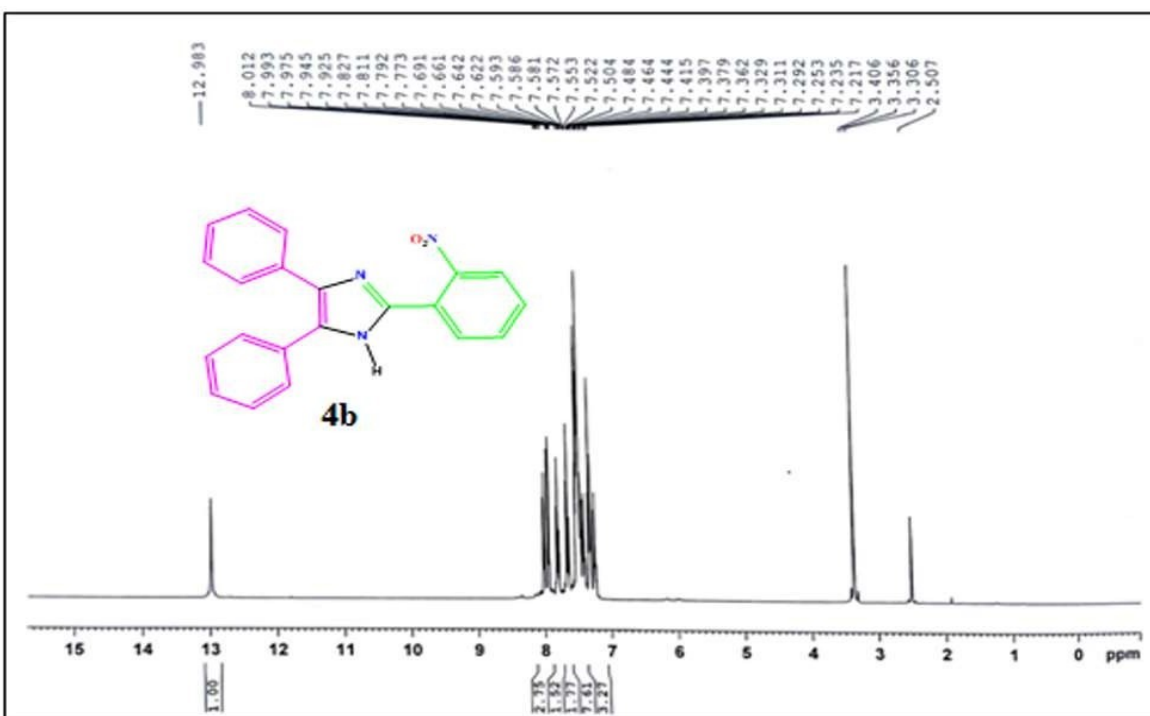

**<sup>1</sup>HNMR spectra of 2-(2-nitrophenyl)-4,5-diphenyl-1H-imidazole (4b)**

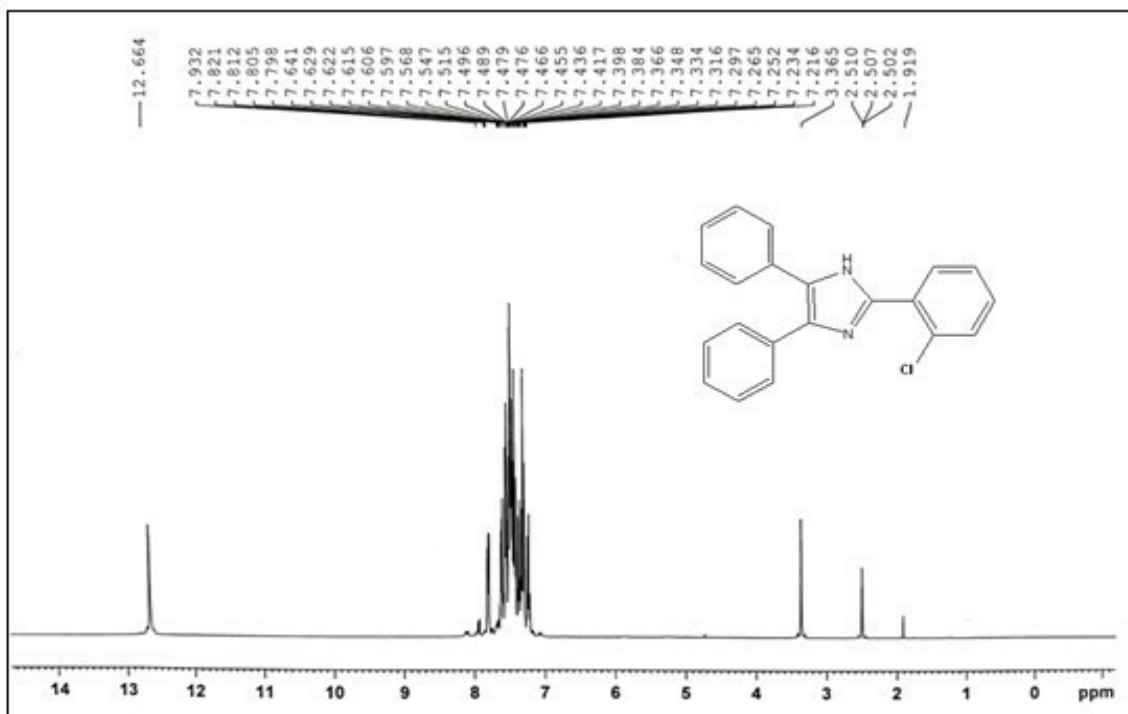

<sup>1</sup>H NMR spectra of 2-(2-chlorophenyl)-4,5-diphenyl-1H-imidazole (4e)

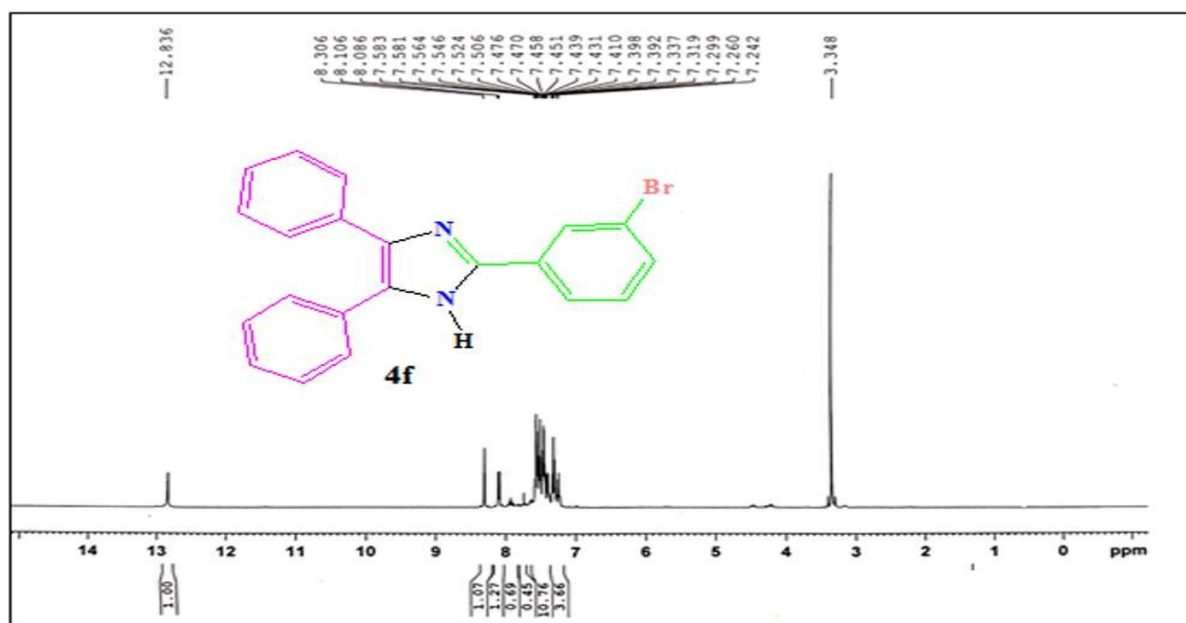

<sup>1</sup>H NMR spectra of 2-(3-bromophenyl)-4,5-diphenyl-1H-imidazole(4f)

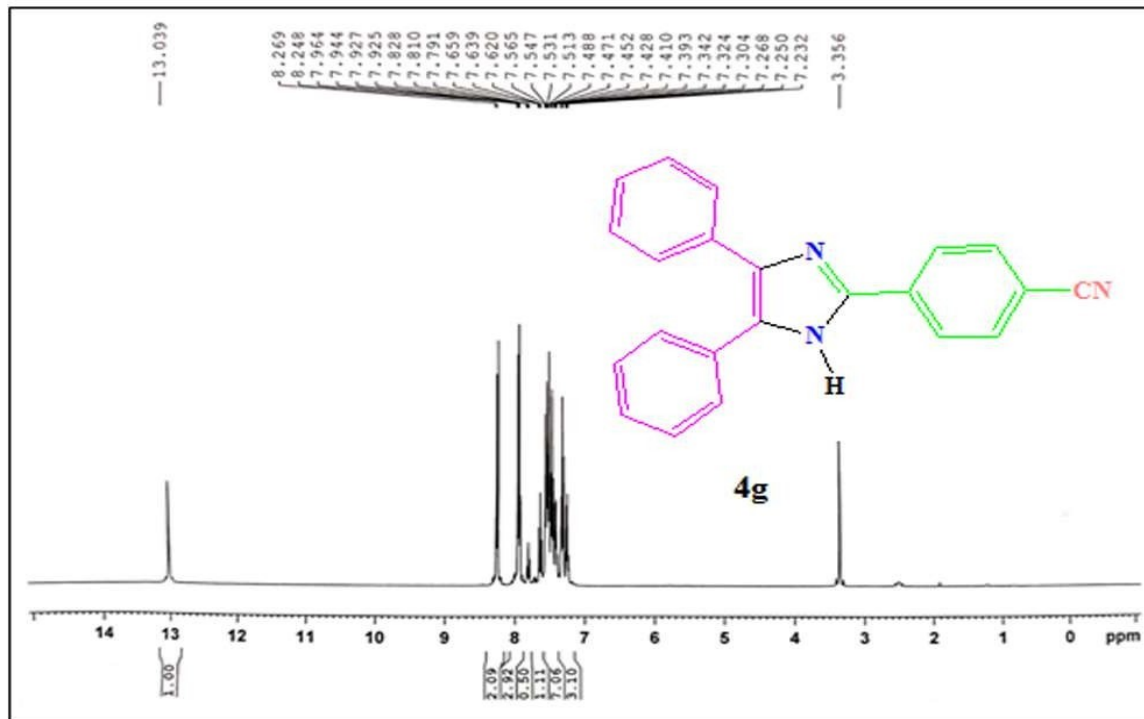

**<sup>1</sup>H NMR of 4-(4,5-diphenyl-1H-imidazol-2-yl)benzonitrile (4g)**

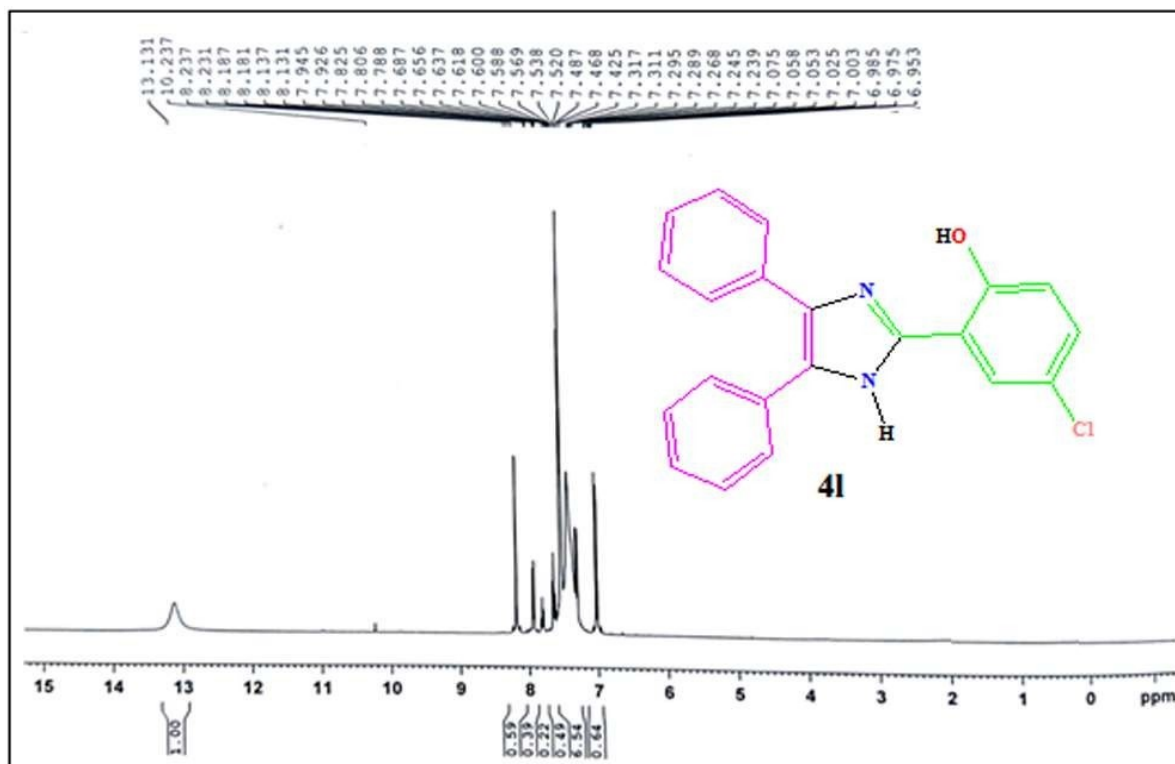

**<sup>1</sup>H NMR spectra of 4-chloro-2-(4,5-diphenyl-1H-imidazol-2-yl)phenol(4l)**

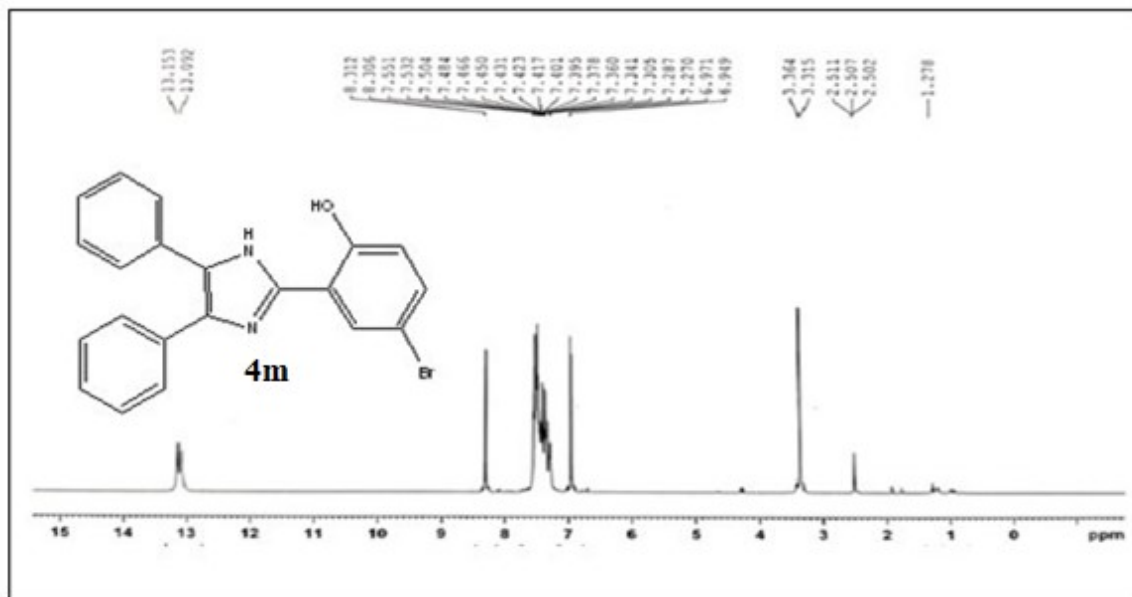

<sup>1</sup>H NMR spectra of 4-bromo-2-(4,5-diphenyl-1H-imidazol-2-yl)phenol(4m)

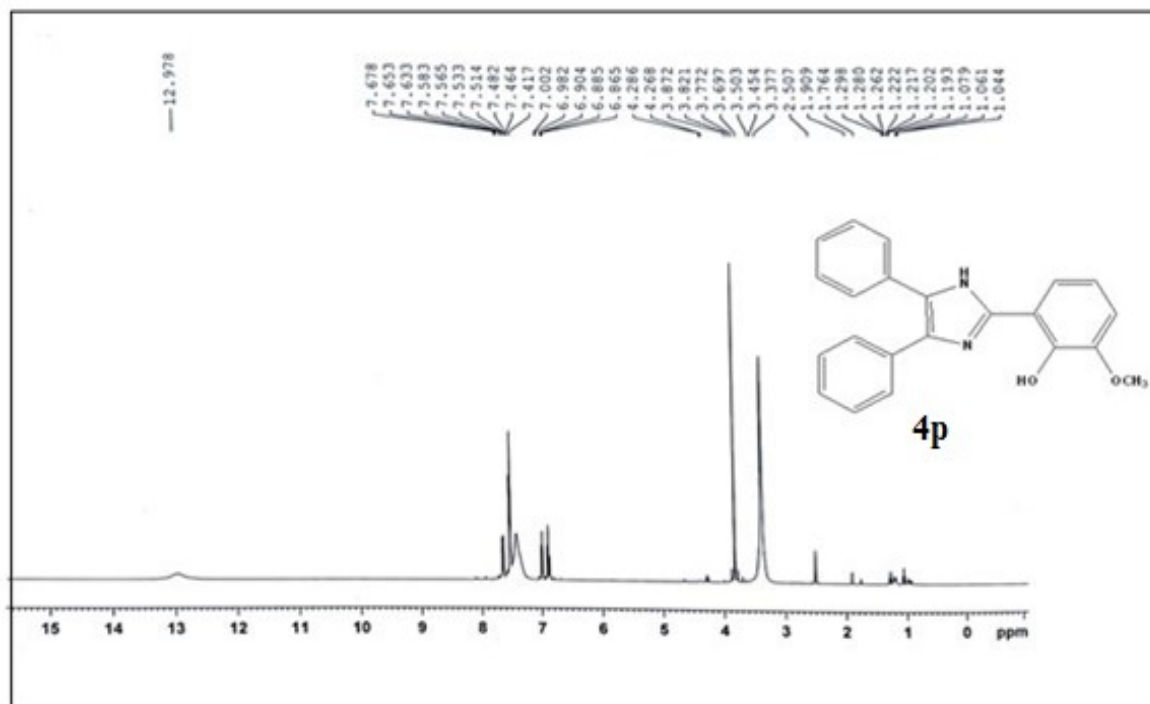

<sup>1</sup>H NMR spectra of 2-methoxy-6-(4,5-diphenyl-1H-imidazol-2-yl)phenol(4p)

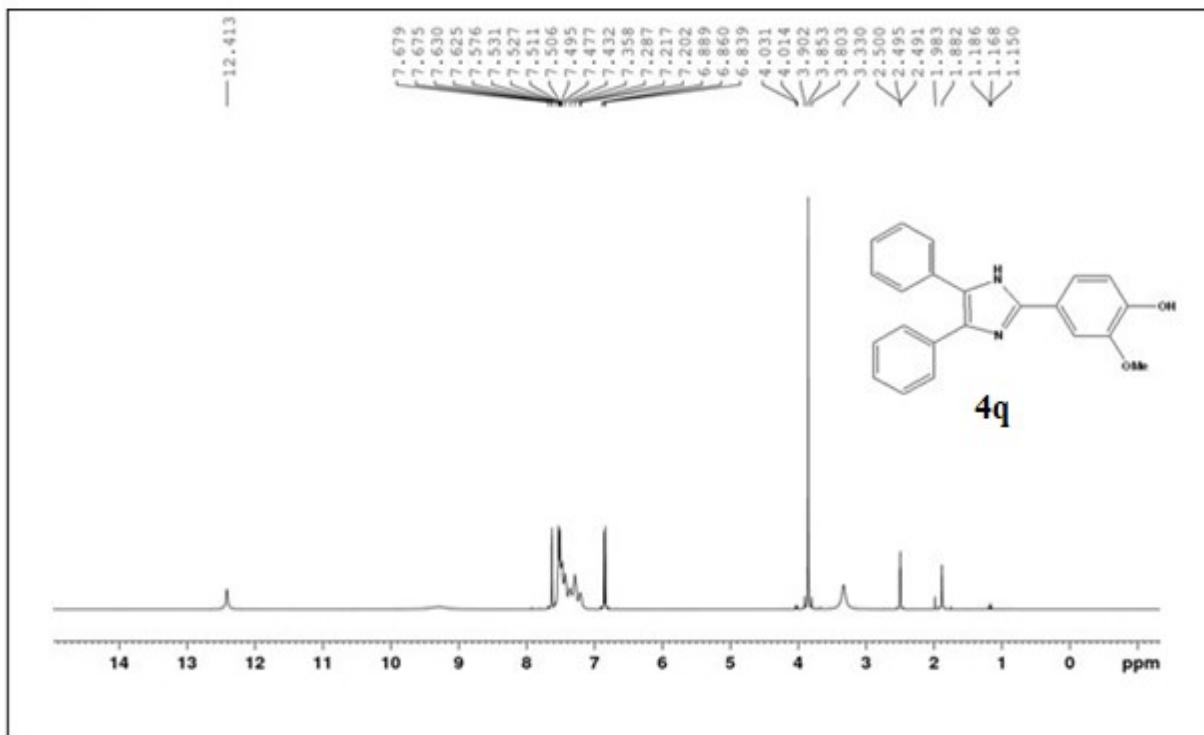

<sup>1</sup>H NMR spectra of 4-(4,5-diphenyl-1H-imidazol-2-yl)-2-methoxyphenol(4q)

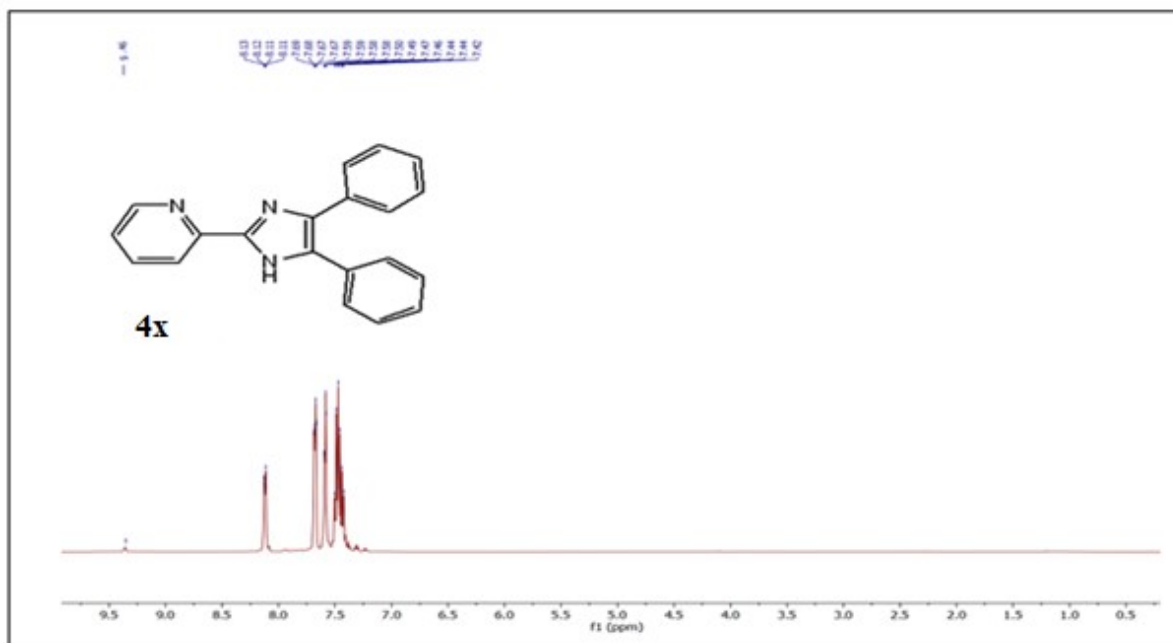

<sup>1</sup>H NMR spectra of 2-(4,5-diphenyl-1H-imidazol-2-yl)pyridine(4x)

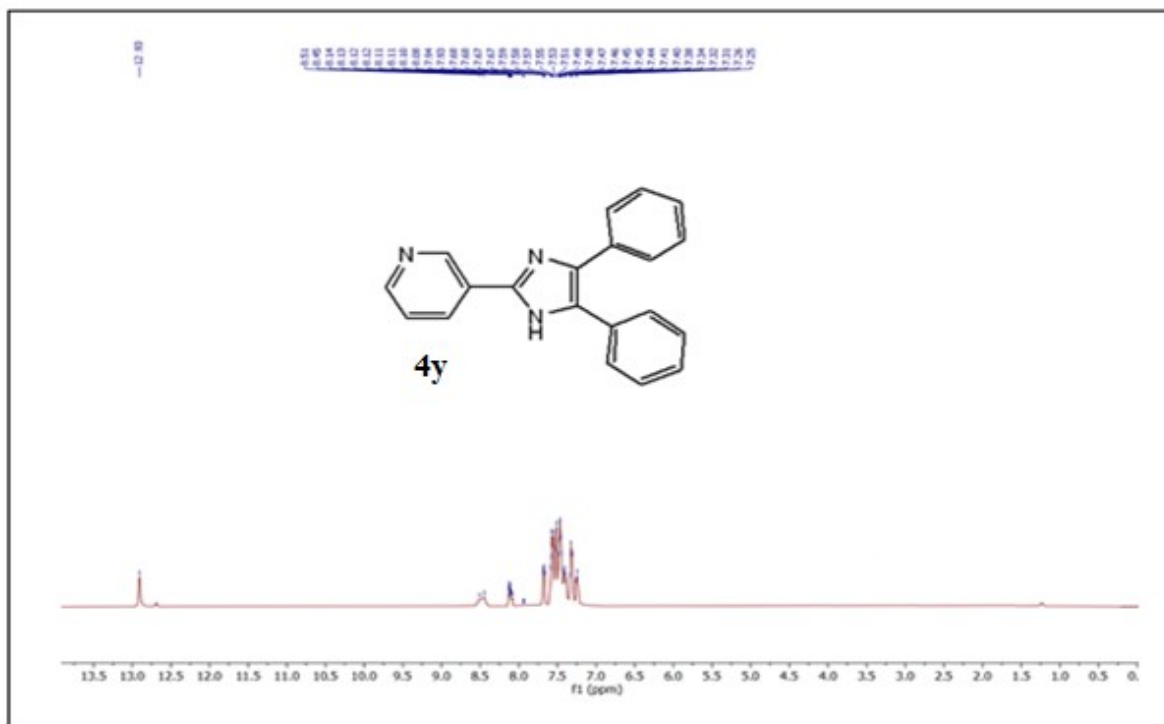

**<sup>1</sup>H NMR spectra of 3-(4,5-diphenyl-1H-imidazol-2-yl)pyridine(4y)**

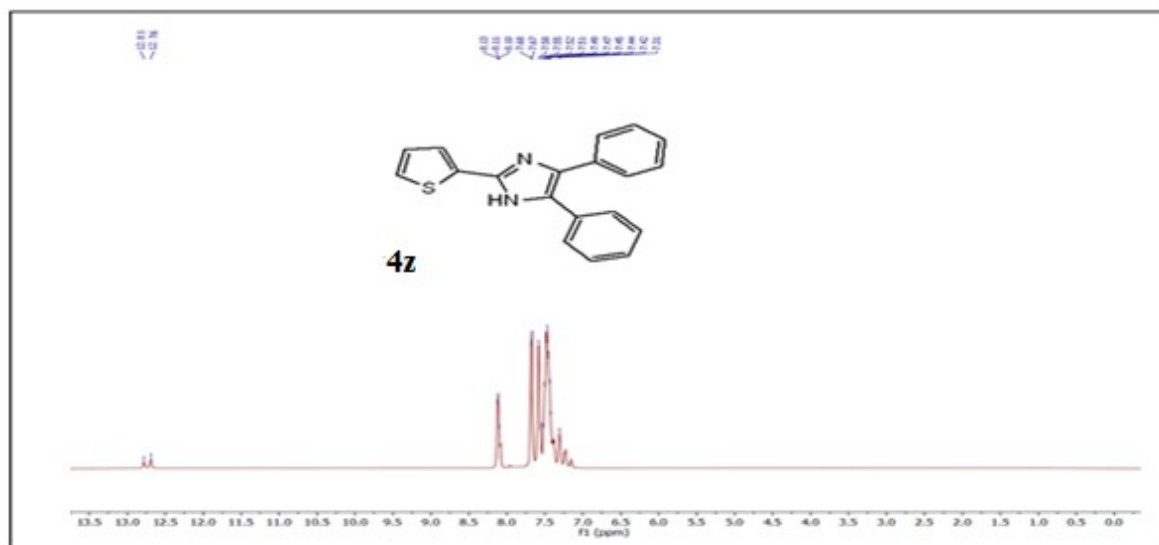



**Table S1. Crystal data collection and structure refinement for compound (6)**

| Crystal data                             |                                                                                                                       |
|------------------------------------------|-----------------------------------------------------------------------------------------------------------------------|
| Moiety formula, Chemical formula         | $\text{Cu}_2\text{C}_8\text{H}_{16}\text{O}_{10}$ , $\text{Cu}_2(\text{O}_2\text{CCH}_3)_4 \cdot 2\text{H}_2\text{O}$ |
| Formula weight                           | 399.31                                                                                                                |
| Crystal system, Space group              | Monoclinic, $C 2/c$                                                                                                   |
| Colour, Size, mm                         | Blue, $0.24 \times 0.22 \times 0.20$                                                                                  |
| Unit cell dimensions                     |                                                                                                                       |
| a, b, c                                  | 13.0799 (8) Å, 8.5056(4) Å, 13.7429(7) Å                                                                              |
| $\alpha$ , $\beta$ , $\gamma$            | $90^\circ$ , $116.887(7)^\circ$ , $90^\circ$                                                                          |
| Volume Å <sup>3</sup> , Z                | 1363.65(13), 4                                                                                                        |
| Density (calculated), Mg/m <sup>3</sup>  | 1.945                                                                                                                 |
| Absorption coefficient, mm <sup>-1</sup> | 3.164                                                                                                                 |
| F(000)                                   | 808                                                                                                                   |
| Data collection                          |                                                                                                                       |
| Temperature, K                           | 119.98(10)                                                                                                            |
| Theta range for data collection          | $2.96^\circ$ to $29.01^\circ$                                                                                         |
| Index ranges                             | $-17 \leq h \leq 17$ , $-11 \leq k \leq 10$ , $-18 \leq l \leq 17$                                                    |
| Reflections collected                    | 8716                                                                                                                  |
| Unique reflections                       | 1660                                                                                                                  |
| Observed reflections ( $>2\sigma(I)$ )   | 1438                                                                                                                  |
| $R_{\text{int}}$                         | 0.0387                                                                                                                |
| Completeness to $\theta$ , %             | $29.01^\circ$ , 91.1                                                                                                  |
| Absorption correction                    | Multi-scan (Rigaku Oxford Diffraction, 2017)<br>$T_{\text{min}} = 0.473$ , $T_{\text{max}} = 0.531$                   |
| Refinement                               |                                                                                                                       |
| Refinement method                        | Full-matrix least-squares on $F^2$                                                                                    |
| Data / restraints / parameters           | 1660 / 0 / 101                                                                                                        |
| Goodness-of-fit on $F^2$                 | 1.052                                                                                                                 |
| Final R indices [ $I > 2\sigma(I)$ ]     | $R_1 = 0.0266$ , $wR_2 = 0.0582$                                                                                      |
| R indices (all data)                     | $R_1 = 0.0328$ , $wR_2 = 0.0603$                                                                                      |
| Largest diff. peak and hole              | 0.532 and $-0.566 \text{ e.Å}^{-3}$                                                                                   |

**III. Table S2 selected bond lengths (Å) and bond angles (°) for compound (6)**

| Bond lengths (Å)         |            |            |            |
|--------------------------|------------|------------|------------|
| Cu(1)-Cu(1) <sup>i</sup> | 2.6118(5)  | Cu(1)-O(3) | 1.9847(15) |
| Cu(1)-O(1)               | 2.1411(17) | Cu(1)-O(4) | 1.9415(15) |
| Cu(1)-O(2)               | 1.9907(15) | Cu(1)-O(5) | 1.9559(15) |

*Symmetry Code: (i) -x+1, -y+1, -z+1*

| Bond angles (°) |          |                 |          |
|-----------------|----------|-----------------|----------|
| O(2)-Cu(1)-O(1) | 92.58(7) | O(4)-Cu(1)-O(2) | 90.29(6) |
| O(3)-Cu(1)-O(1) | 98.35(7) | O(5)-Cu(1)-O(2) | 89.42(6) |
| O(4)-Cu(1)-O(1) | 97.28(7) | O(4)-Cu(1)-O(3) | 87.20(6) |
| O(5)-Cu(1)-O(1) | 93.52(7) | O(5)-Cu(1)-O(3) | 91.06(6) |

**Table S3. Hydrogen bonded geometries in compound (6)**

| Bond                             | D - H   | H···A   | D···A    | D - H···A |
|----------------------------------|---------|---------|----------|-----------|
| O(1)-H(1A)···O(3) <sup>iii</sup> | 0.73(3) | 2.16(3) | 2.892(3) | 171(3)    |
| O(1)-H(1B)···O(2) <sup>iv</sup>  | 0.77(3) | 2.02(3) | 2.786(2) | 175(4)    |
| C(4)-H(4A)···O(5) <sup>v</sup>   | 0.96    | 2.58    | 3.522(3) | 168       |

*Symmetry Code: (iii) -1/2-x, 1/2-y, -z; (iv) -x, y, 1/2-z; (v) 1/2+x, 1/2+y, z*
